# Supplementary material for: Glycaemic control and associated factors among patients living with type 2 diabetes in Kinshasa, Democratic Republic of the Congo: a Cross-sectional study
Source: bioRxiv or medRxiv preprint supplement (doi:10.1101/2023.02.03.23285406), 2023-02-07
Supplement: Supplementary file [file media-2.pdf]

**Supplementary table 1** Psychological characteristics and glycaemic control among patients living with type 2 diabetes in Kinshasa, Democratic Republic of the Congo, n=620 (2021-2022)

|                                           | <b>Controlled<br/>(n, %(95%CI))</b> | <b>Uncontrolled<br/>(n, %(95%CI))</b> | <b>All participants<br/>(n, %)</b> | <b>p</b> |
|-------------------------------------------|-------------------------------------|---------------------------------------|------------------------------------|----------|
| Adherence to treatment                    |                                     |                                       |                                    | 0.427    |
| High                                      | 110 (31.3 (23.4 to 40.3))           | 241 (68.7 (59.7 to 76.6))             | 351 (100.0)                        |          |
| Moderate                                  | 76 (35.0 (29.2 to 41.4))            | 141 (65.0 (58.6 to 70.8))             | 217 (100.0)                        |          |
| Low                                       | 14 (26.8 (17.0 to 39.7))            | 38 (73.2 (60.3 to 83.0))              | 52 (100.0)                         |          |
| Depression                                |                                     |                                       |                                    | 0.535    |
| Without depression                        | 198 (32.3 (26.5 to 38.7))           | 414 (67.6 (61.3 to 73.5))             | 612 (100.0)                        |          |
| Moderate depression                       | 1 (16.7 (2.6 to 60.0))              | 5 (83.3 (40.0 to 95.4))               | 6 (100.0)                          |          |
| Moderately severe depression              | 1 (50.1 (4.6 to 95.4))              | 1 (49.9 (4.6 to 95.4))                | 2 (100.0)                          |          |
| Multidimensional perceived social support |                                     |                                       |                                    |          |
| Total score                               |                                     |                                       |                                    | 0.299    |
| Low support                               | 40 (28.8 (20.6 to 38.6))            | 99 (71.2 (61.4 to 79.4))              | 139 (100.0)                        |          |
| Moderate support                          | 150 (32.5 (25.6 to 40.4))           | 310 (67.5 (59.6 to 74.4))             | 460 (100.0)                        |          |
| High support                              | 10 (47.4 (27.8 to 67.8))            | 11 (52.6 (32.2 to 72.2))              | 21 (100.0)                         |          |
| Significant others                        |                                     |                                       |                                    | 0.006*   |
| Low support                               | 49 (26.9 (19.3 to 36.1))            | 133 (73.1 (63.9 to 80.7))             | 182 (100.0)                        |          |
| Moderate support                          | 98 (30.2 (23.2 to 38.2))            | 227 (69.8 (61.8 to 76.8))             | 325 (100.0)                        |          |
| High support                              | 53 (46.7 (38.1 to 55.6))            | 60 (53.3 (44.4 to 61.9))              | 113 (100.0)                        |          |
| Family                                    |                                     |                                       |                                    | 0.020*   |
| Low support                               | 44 (31.5 (24.7 to 39.3))            | 96 (68.5 (60.7 to 75.3))              | 140 (100.0)                        |          |
| Moderate support                          | 111 (28.7 (21.4 to 37.2))           | 275 (71.3 (62.8 to 78.6))             | 386 (100.0)                        |          |
| High support                              | 45 (47.8 (36.3 to 59.5))            | 49 (52.2 (40.5 to 63.7))              | 94 (100.0)                         |          |
| Friends                                   |                                     |                                       |                                    | 0.463    |
| Low support                               | 100 (35.3 (27.1 to 44.5))           | 182 (64.7 (55.5 to 72.9))             | 282 (100.0)                        |          |

|                    |                           |                           |             |        |
|--------------------|---------------------------|---------------------------|-------------|--------|
| Moderate support   | 95 (29.6 (20.7 to 40.4))  | 226 (70.4 (59.6 to 79.3)) | 321 (100.0) |        |
| High support       | 5 (29.4 (17.1 to 45.6))   | 12 (70.6 (54.4 to 82.9))  | 17 (100.0)  |        |
| Diabetes distress  |                           |                           |             |        |
| Total score        |                           |                           |             | 0.113  |
| No distress        | 105 (39.0 (31.8 to 46.8)) | 163 (61.0 (53.2 to 68.2)) | 268 (100.0) |        |
| Moderate distress  | 37 (26.8 (19.5 to 35.5))  | 101 (73.2 (64.5 to 80.5)) | 138 (100.0) |        |
| High distress      | 58 (27.2 (16.9 to 40.6))  | 156 (72.8 (59.4 to 83.1)) | 214 (100.0) |        |
| Emotional          |                           |                           |             | 0.375  |
| No distress        | 135 (34.1 (27.9 to 40.9)) | 260 (65.9 (59.1 to 72.1)) | 395 (100.0) |        |
| High distress      | 65 (28.9 (19.8 to 40.2))  | 160 (71.1 (59.8 to 80.2)) | 225 (100.0) |        |
| Regimen            |                           |                           |             | 0.033* |
| No distress        | 102 (39.7 (32.1 to 47.9)) | 154 (60.3 (52.1 to 67.9)) | 256 (100.0) |        |
| Moderate distress  | 31 (21.5 (14.7 to 30.3))  | 113 (78.5 (69.7 to 85.3)) | 144 (100.0) |        |
| High distress      | 67 (30.5 (20.7 to 42.5))  | 153 (69.5 (57.5 to 79.3)) | 220 (100.0) |        |
| Interpersonal      |                           |                           |             | 0.293  |
| No distress        | 91 (36.7 (29.1 to 45.1))  | 156 (63.3 (54.9 to 70.9)) | 247 (100.0) |        |
| Moderate distress  | 37 (28.4 (22.3 to 35.4))  | 93 (71.6 (64.6 to 77.7))  | 130 (100.0) |        |
| High distress      | 72 (29.6 (19.9 to 41.6))  | 169 (70.4 (58.4 to 80.1)) | 243 (100.0) |        |
| Physician          |                           |                           |             | 0.134  |
| No distress        | 106 (38.0 (30.8 to 45.8)) | 172 (62.0 (54.2 to 69.2)) | 278 (100.0) |        |
| Moderate distress  | 40 (30.9 (25.7 to 36.6))  | 89 (69.1 (63.4 to 74.3))  | 129 (100.0) |        |
| High distress      | 54 (25.5 (15.3 to 39.2))  | 159 (74.5 (60.8 to 84.7)) | 213 (100.0) |        |
| Self-management    |                           |                           |             |        |
| Total score        |                           |                           |             | 0.748  |
| Good adherence     | 193 (32.4 (26.2 to 39.3)) | 402 (67.6 (60.7 to 73.8)) | 595 (100.0) |        |
| Poor adherence     | 7 (28.3 (11.2 to 55.3))   | 18 (71.7 (44.7 to 88.8))  | 25 (100.0)  |        |
| Dietary control    |                           |                           |             | 0.386  |
| Good adherence     | 174 (33.0 (26.0 to 40.8)) | 352 (67.0 (59.2 to 74.0)) | 526 (100.0) |        |
| Poor adherence     | 26 (27.7 (19.8 to 37.2))  | 68 (72.3 (62.8 to 80.2))  | 94 (100.0)  |        |
| Glucose management |                           |                           |             | 0.511  |

|                       |                           |                           |             |
|-----------------------|---------------------------|---------------------------|-------------|
| Good adherence        | 181 (32.7 (26.5 to 39.6)) | 371 (67.3 (60.4 to 73.5)) | 552 (100.0) |
| Poor adherence        | 19 (28.0 (16.4 to 43.4))  | 49 (72.0 (56.6 to 83.6))  | 68 (100.0)  |
| Physician contact     |                           |                           | 0.304       |
| Good adherence        | 183 (33.1 (26.3 to 40.6)) | 369 (66.9 (59.4 to 73.7)) | 552 (100.0) |
| Poor adherence        | 17 (25.1 (15.1 to 38.7))  | 51 (74.9 (61.3 to 84.9))  | 68 (100.0)  |
| Physical activity     |                           |                           | 0.019*      |
| Good adherence        | 110 (28.5 (22.7 to 35.2)) | 275 (71.5 (64.8 to 77.3)) | 385 (100.0) |
| Poor adherence        | 90 (38.2 (30.5 to 46.6))  | 145 (61.8 (53.4 to 69.5)) | 235 (100.0) |
| Knowledge on diabetes |                           |                           | 0.097       |
| Low                   | 62 (35.6 (27.6 to 44.6))  | 112 (64.4 (55.4 to 72.4)) | 174 (100.0) |
| Acceptable            | 68 (27.7 (20.9 to 35.7))  | 177 (72.3 (64.3 to 79.1)) | 245 (100.0) |
| Good                  | 70 (34.7 (28.5 to 41.5))  | 131 (65.3 (58.5 to 71.5)) | 201 (100.0) |

\*p<0.05
